# Supplementary material
Source: publisher site journal article supplement (https://www.dovepress.com/article/390364)
Supplement: Supplementary file 1 [file get_supplementary_file.php]

## Appendix 1: Questionnaire - Self-reported adverse events of COVID-19 Vaccines among health professionals in India

# Self-reported adverse events of COVID-19 vaccines among health professionals in India

### INFORMATION SHEET FOR PARTICIPATION IN RESEARCH

The following information is being presented to help you decide whether or not you want to take part in this survey.

Please read this carefully. If you do not understand anything, please feel free to contact the investigators with any questions.

### PERSONS IN CHARGE OF THE STUDY:

Principal Investigator:

Professor Dr. Johnson Moses, Dean, Sree Balaji Medical College, Chennai, Tamil Nadu, India.

### DESCRIPTION AND PURPOSE:

This study is a cross-sectional survey of health care professionals of India. The aim of the study is to investigate the self-reported adverse events of COVID-19 vaccines among health professionals in India.

We plan to publish the research findings. However, participants' responses will only be reported in aggregate, and no individual information will be shared.

### INSTRUCTIONS:

Participation involves completing the attached questionnaire. It will take approximately 10-15 minutes.

### BENEFITS:

There is no direct benefit from participating in this study.

### RISKS:

We do not anticipate any risks greater than what you might experience in everyday life.

Questions and Contacts: If you have any questions about this research study, please contact the principal investigator, Professor Dr. Johnson Moses. Email:

[johnsonmoses@gmail.com](mailto:johnsonmoses@gmail.com).

By continuing to the next page, you indicate your consent and willingness to participate.

---

\*Required

Have you taken the vaccine?

## 1. 1. Have you taken the vaccine? \*

*Mark only one oval.*

- Yes, only first dose
- Yes, 1st and 2nd doses
- Not yet (PLEASE DISCONTINUE THE SURVEY)  
*Skip to section 7 (Thank you for your participation.)*

## Demographic and vaccine-related information

## 2. 2. Which vaccine have you taken? \*

*Mark only one oval.*

- Covishield/Astrazeneca
- Covaxin (India)
- Pfizer
- Mordana
- Sinovac
- Sputnik V
- Other: \_\_\_\_\_

## 3. 3. Did you get COVID-19? \*

*Mark only one oval.*

- Yes, tested positive (RT-PCR)
- Yes, tested positive (CT)
- Yes, never tested (symptomatic)
- No

4. 4. [If you were tested COVID-19 positive (RT-PCR or CT), please answer this question] When did you get the COVID-19?

*Mark only one oval.*

- Before the 1st dose of vaccination
- After the 2nd dose of vaccination
- Between 1st dose and 2nd dose of vaccination

5. 5. Gender \*

*Mark only one oval.*

- Male
- Female
- Transgender
- Prefer not to respond

6. 6. Age (in years) \*

---

7. 7. Occupation \*

*Mark only one oval.*

- Doctor
- Laboratory Technician
- Nurse
- Pharmacist
- Physiotherapist
- Radiographer
- Technologist
- Dentist
- Other: \_\_\_\_\_

8. 8. In which healthcare setting do you work? \*

*Mark only one oval.*

- Private
- Public/Government
- Other: \_\_\_\_\_

9. 9. Please name of the organization you are currently working and the State: \*

---

---

---

---

---

10. 10. Do you have one or more chronic illness?

*Tick all that apply.*

- No illness
- Diabetes
- Obesity
- Asthma
- Hypertension
- Autoimmune diseases
- Kidney disease
- Liver disease
- Other:  \_\_\_\_\_

11. 11. Did you notice any side-effects/adverse events after receiving your vaccine (1st dose)? \*

*Mark only one oval.*

- Yes
- No (Please go to Question 17)      *Skip to question 17*

In the next section, please only mention the adverse events of FIRST DOSE of vaccine you have experienced.

### Common Adverse Events

12. Did you notice any side-effects/adverse events after receiving your vaccine (1st dose)? Please select as many as apply.

Mark only one oval per row.

|                                 | Severe! I had to seek medical attention | Moderate. I had to stop my daily activities | Mild. I was still able to do most daily activities | Not sure/             | No                    |
|---------------------------------|-----------------------------------------|---------------------------------------------|----------------------------------------------------|-----------------------|-----------------------|
| Soreness of the injected arm    | <input type="radio"/>                   | <input type="radio"/>                       | <input type="radio"/>                              | <input type="radio"/> | <input type="radio"/> |
| Soreness of my muscles all over | <input type="radio"/>                   | <input type="radio"/>                       | <input type="radio"/>                              | <input type="radio"/> | <input type="radio"/> |
| Fever (more than 99.5°F)        | <input type="radio"/>                   | <input type="radio"/>                       | <input type="radio"/>                              | <input type="radio"/> | <input type="radio"/> |
| Headache                        | <input type="radio"/>                   | <input type="radio"/>                       | <input type="radio"/>                              | <input type="radio"/> | <input type="radio"/> |
| Trouble seeing/ double vision   | <input type="radio"/>                   | <input type="radio"/>                       | <input type="radio"/>                              | <input type="radio"/> | <input type="radio"/> |
| Tiredness (more than usual)     | <input type="radio"/>                   | <input type="radio"/>                       | <input type="radio"/>                              | <input type="radio"/> | <input type="radio"/> |
| Sleeping more than usual        | <input type="radio"/>                   | <input type="radio"/>                       | <input type="radio"/>                              | <input type="radio"/> | <input type="radio"/> |
| Sleeping less than usual        | <input type="radio"/>                   | <input type="radio"/>                       | <input type="radio"/>                              | <input type="radio"/> | <input type="radio"/> |
| Sleeping better than usual      | <input type="radio"/>                   | <input type="radio"/>                       | <input type="radio"/>                              | <input type="radio"/> | <input type="radio"/> |
| I felt great!/ Had more energy  | <input type="radio"/>                   | <input type="radio"/>                       | <input type="radio"/>                              | <input type="radio"/> | <input type="radio"/> |
| Feel less anxious               | <input type="radio"/>                   | <input type="radio"/>                       | <input type="radio"/>                              | <input type="radio"/> | <input type="radio"/> |
| Swelling of the injected arm    | <input type="radio"/>                   | <input type="radio"/>                       | <input type="radio"/>                              | <input type="radio"/> | <input type="radio"/> |
| Swelling all                    | <input type="radio"/>                   | <input type="radio"/>                       | <input type="radio"/>                              | <input type="radio"/> | <input type="radio"/> |

over/ I had an  
allergic  
reaction

---

Rash or itching  
over the  
injected arm

---

Abdominal  
pain

---

Diarrhoea

---

Nausea

---

Vomiting

---

13. 13. If you noticed any change after receiving the vaccine (1st dose), when did it start?

Mark only one oval per row.

|                                               | That same day         | 1-3 days after        | 4-7 days after        | Not Experienced       |
|-----------------------------------------------|-----------------------|-----------------------|-----------------------|-----------------------|
| Soreness of the injected arm                  | <input type="radio"/> | <input type="radio"/> | <input type="radio"/> | <input type="radio"/> |
| Soreness of my muscles all over               | <input type="radio"/> | <input type="radio"/> | <input type="radio"/> | <input type="radio"/> |
| Fever (more than 99.5°F)                      | <input type="radio"/> | <input type="radio"/> | <input type="radio"/> | <input type="radio"/> |
| Headache                                      | <input type="radio"/> | <input type="radio"/> | <input type="radio"/> | <input type="radio"/> |
| Trouble seeing/ double vision                 | <input type="radio"/> | <input type="radio"/> | <input type="radio"/> | <input type="radio"/> |
| Tiredness (more than usual)                   | <input type="radio"/> | <input type="radio"/> | <input type="radio"/> | <input type="radio"/> |
| Sleeping more than usual                      | <input type="radio"/> | <input type="radio"/> | <input type="radio"/> | <input type="radio"/> |
| Sleeping less than usual                      | <input type="radio"/> | <input type="radio"/> | <input type="radio"/> | <input type="radio"/> |
| Sleeping better than usual                    | <input type="radio"/> | <input type="radio"/> | <input type="radio"/> | <input type="radio"/> |
| I felt great!/ Had more energy                | <input type="radio"/> | <input type="radio"/> | <input type="radio"/> | <input type="radio"/> |
| Feel less anxious                             | <input type="radio"/> | <input type="radio"/> | <input type="radio"/> | <input type="radio"/> |
| Swelling of the injected arm                  | <input type="radio"/> | <input type="radio"/> | <input type="radio"/> | <input type="radio"/> |
| Swelling all over/ I had an allergic reaction | <input type="radio"/> | <input type="radio"/> | <input type="radio"/> | <input type="radio"/> |
| Rash or itching over the injected arm         | <input type="radio"/> | <input type="radio"/> | <input type="radio"/> | <input type="radio"/> |
| Abdominal pain                                | <input type="radio"/> | <input type="radio"/> | <input type="radio"/> | <input type="radio"/> |
| Diarrhoea                                     | <input type="radio"/> | <input type="radio"/> | <input type="radio"/> | <input type="radio"/> |
| Nausea                                        | <input type="radio"/> | <input type="radio"/> | <input type="radio"/> | <input type="radio"/> |
| Vomiting                                      | <input type="radio"/> | <input type="radio"/> | <input type="radio"/> | <input type="radio"/> |



14. 14. If you noticed a change after receiving the vaccine (1st dose), how long it lasted?

Mark only one oval per row.

|                                               | That same day         | 1-3 days              | 4-7 days              | Still present         | Not Experienced       |
|-----------------------------------------------|-----------------------|-----------------------|-----------------------|-----------------------|-----------------------|
| Soreness of the injected arm                  | <input type="radio"/> |
| Soreness of my muscles all over               | <input type="radio"/> |
| Fever (more than 99.5°F)                      | <input type="radio"/> |
| Headache                                      | <input type="radio"/> |
| Trouble seeing/ double vision                 | <input type="radio"/> |
| Tiredness (more than usual)                   | <input type="radio"/> |
| Sleeping more than usual                      | <input type="radio"/> |
| Sleeping less than usual                      | <input type="radio"/> |
| Sleeping better than usual                    | <input type="radio"/> |
| I felt great!/ Had more energy                | <input type="radio"/> |
| Feel less anxious                             | <input type="radio"/> |
| Swelling of the injected arm                  | <input type="radio"/> |
| Swelling all over/ I had an allergic reaction | <input type="radio"/> |
| Rash or itching over the injected arm         | <input type="radio"/> |
| Abdominal pain                                | <input type="radio"/> |
| Diarrhoea                                     | <input type="radio"/> |
| Nausea                                        | <input type="radio"/> |
| Vomiting                                      | <input type="radio"/> |

15. 15. If you had any other adverse event(s), please specify the severity of the event(s), when it was started and how long it lasted?

---



---



---



---



---

16. 16. Did you take or do anything that helped in reducing the adverse events?

*Mark only one oval per row.*

|                                  | Yes                   | No                    |
|----------------------------------|-----------------------|-----------------------|
| Paracetamol/ Panadol             | <input type="radio"/> | <input type="radio"/> |
| Ibuprofen/Advil                  | <input type="radio"/> | <input type="radio"/> |
| Other pain killer/ Fever reducer | <input type="radio"/> | <input type="radio"/> |
| Cold bath/ shower/ sponge        | <input type="radio"/> | <input type="radio"/> |
| Sleep                            | <input type="radio"/> | <input type="radio"/> |
| Drinking more water              | <input type="radio"/> | <input type="radio"/> |
| Nothing seemed to help           | <input type="radio"/> | <input type="radio"/> |
| I did not need to take anything  | <input type="radio"/> | <input type="radio"/> |
| Other                            | <input type="radio"/> | <input type="radio"/> |

### Rare Adverse Events

17. 17. Are you aware of the increased risk of blood clots (thromboembolic events) after COVID-19 vaccination? \*

*Mark only one oval.*

- Yes
- No
- I don't know

18. 18. Are you aware of the increased risk of low platelets (thrombocytopenia) after COVID-19 vaccination? \*

*Mark only one oval.*

- Yes
- No
- I don't know

19. 19. Have you noticed similar effects after taking other vaccines (e.g. BCG, Hepatitis vaccine, Influenza vaccine)? \*

*Mark only one oval.*

- Yes
- No
- I don't remember

Thank you for your participation.

---

This content is neither created nor endorsed by Google.

Google Forms
